# Supplementary material for: The upstream 5′ splice site remains associated to the transcription machinery during intron synthesis
Source: PubMed Central journal article supplement (PMC8316553; doi:10.1038/s41467-021-24774-6), 2021-07-27
Supplement: 41467_2021_24774_MOESM1_ESM.pdf [file 41467_2021_24774_MOESM1_ESM.pdf]

1 **SUPPLEMENTARY INFORMATION**

2 **The upstream 5' splice site remains associated to the transcription**  
3 **machinery during intron synthesis**

4

5 Yodfat Leader<sup>1\*</sup>, Galit Lev Maor<sup>1\*†</sup>, Matan Sorek<sup>2\*</sup>, Ronna Shayevitch<sup>1</sup>, Maram  
6 Hussein<sup>1</sup>, Ofir Hameiri<sup>1</sup>, Luna Tammer<sup>1</sup>, Jonathan Zonszain<sup>1</sup>, Ifat Keydar<sup>1</sup>, Dror  
7 Hollander<sup>1</sup>, Eran Meshorer<sup>2</sup>, and Gil Ast<sup>1 †</sup>

8

9 <sup>1</sup>Department of Human Molecular Genetics and Biochemistry, Sackler Faculty of  
10 Medicine, Tel-Aviv University, Ramat Aviv 69978, Israel.

11 <sup>2</sup>Department of Genetics, The Institute of Life Sciences, and The Edmond and Lily  
12 Center for Brain Sciences (ELSC). The Hebrew University of Jerusalem, Edmond J.  
13 Safra Campus, Jerusalem 91904, Israel.

14

15 \*These authors contributed equally to this work.

16

17 †Corresponding authors. Contact information: Gil Ast, gilast@post.tau.ac.il. Galit Lev  
18 Maor, galitlm@tauex.tau.ac.il

19

20

21

22

23

24

25

26

27

28 **Supplementary Figures**

29 **Supplementary Figure 1**

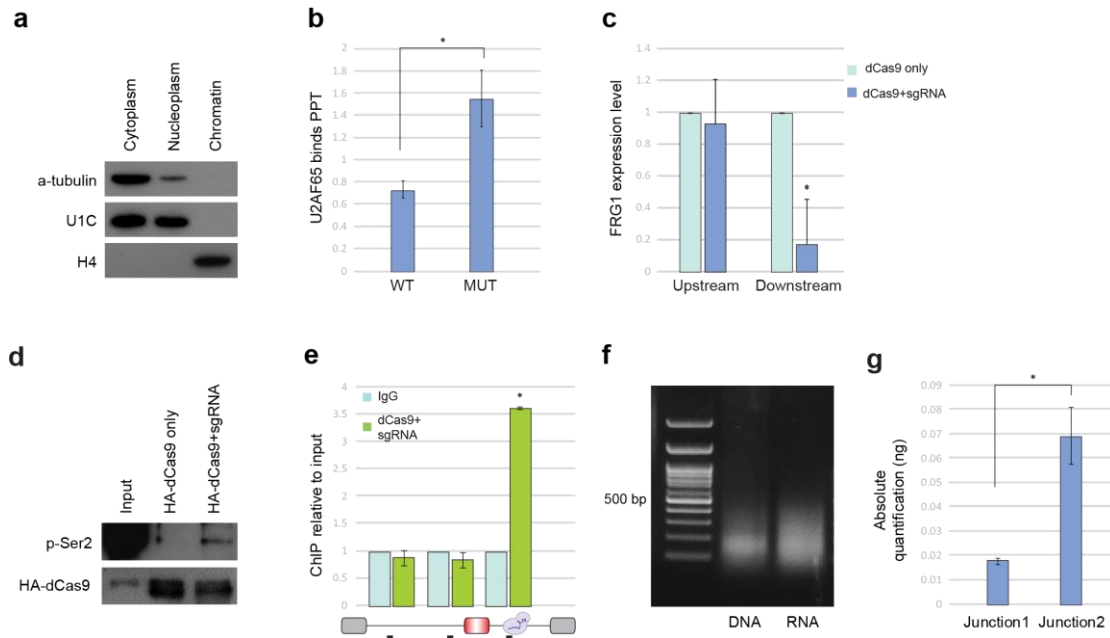

30

31 **Supplementary Figure 1. CRISPR- interference analyses.** **a.** HEK293 cells  
32 fractionation. a western blot was done with anti- $\alpha$ -tubulin, anti-U1C, and anti-Histone  
33 4 antibodies detected in the cytoplasmic, nucleoplasmic, and chromatin fractions,  
34 respectively. Twenty-five micrograms of total protein from each fraction was loaded  
35 per lane. Source data are provided as a Source Data file. **b.** *FRG1* WT and MUT cells  
36 were crosslinked with FA and nuclei were isolated. RNA was fragmented with MNase  
37 and sonication. Immunoprecipitation was performed using U2AF65 antibody, the RNA  
38 was extracted, and qRT-PCR was performed to examine the enrichment of the PPT of  
39 intron 1 *FRG1* minigene.  $N=3$  independent experiments. Error bars show mean values  
40  $\pm$  SEM. Asterisk indicates  $P = 0.037$  two-tailed t-test. **c.** *FRG1* WT cells were  
41 transfected with a plasmid for expression of HA-dCas9 with or without the plasmid for  
42 expression of sgRNA targeted against a location in the middle of *FRG1* intron 2. After  
43 48 h RNA was extracted and RT was done using hexamers primer. Relative *FRG1* RNA  
44 level were measured using qRT-PCR with primers specific for nascent *FRG1* transcript.  
45 The primers were located near the start and end of the transcript.  $N=3$  independent  
46 experiments. Error bars show mean values + SEM. Asterisk indicates  $P = 0.037$  two-

47 tailed t-test. **d.** The CRISPR interference-based protocol was performed. After HA-  
48 dCas9 IP, a western blot was done with anti-p-Ser2 pol II and anti-HA antibodies.  
49 Source data are provided as a Source Data file. **e.** CRISPR interference-based protocol  
50 targeting the middle intron of the *FRG1* minigene was performed, and mean DNA levels  
51 were measured by qPCR.  $N=3$  independent experiments. Error bars show mean values  
52  $\pm$  SEM. Asterisk indicates  $P = 0.020$  two-tailed t-test. Each bar corresponds to the  
53 amplified segment marked in the gene diagram below the graph. The sgRNA binding  
54 is indicated as a purple shape. **f.** Agarose gel of purified DNA and RNA after MNase  
55 and sonication treatment. **g.** RNA extraction from WT cells CRISPR interference-based  
56 protocol. RNA was quantified by absolute qRT-PCR.  $N=3$  independent experiments.  
57 Error bars show mean values  $\pm$  SEM. Asterisk indicates  $P = 0.032$  two-tailed t-test.  
58 Junction-1 denotes the exon 1- intron 1 junction, and Junction-2 denotes the exon 2-  
59 intron 2 junction.

60

61

62 **Supplementary Figure 2**

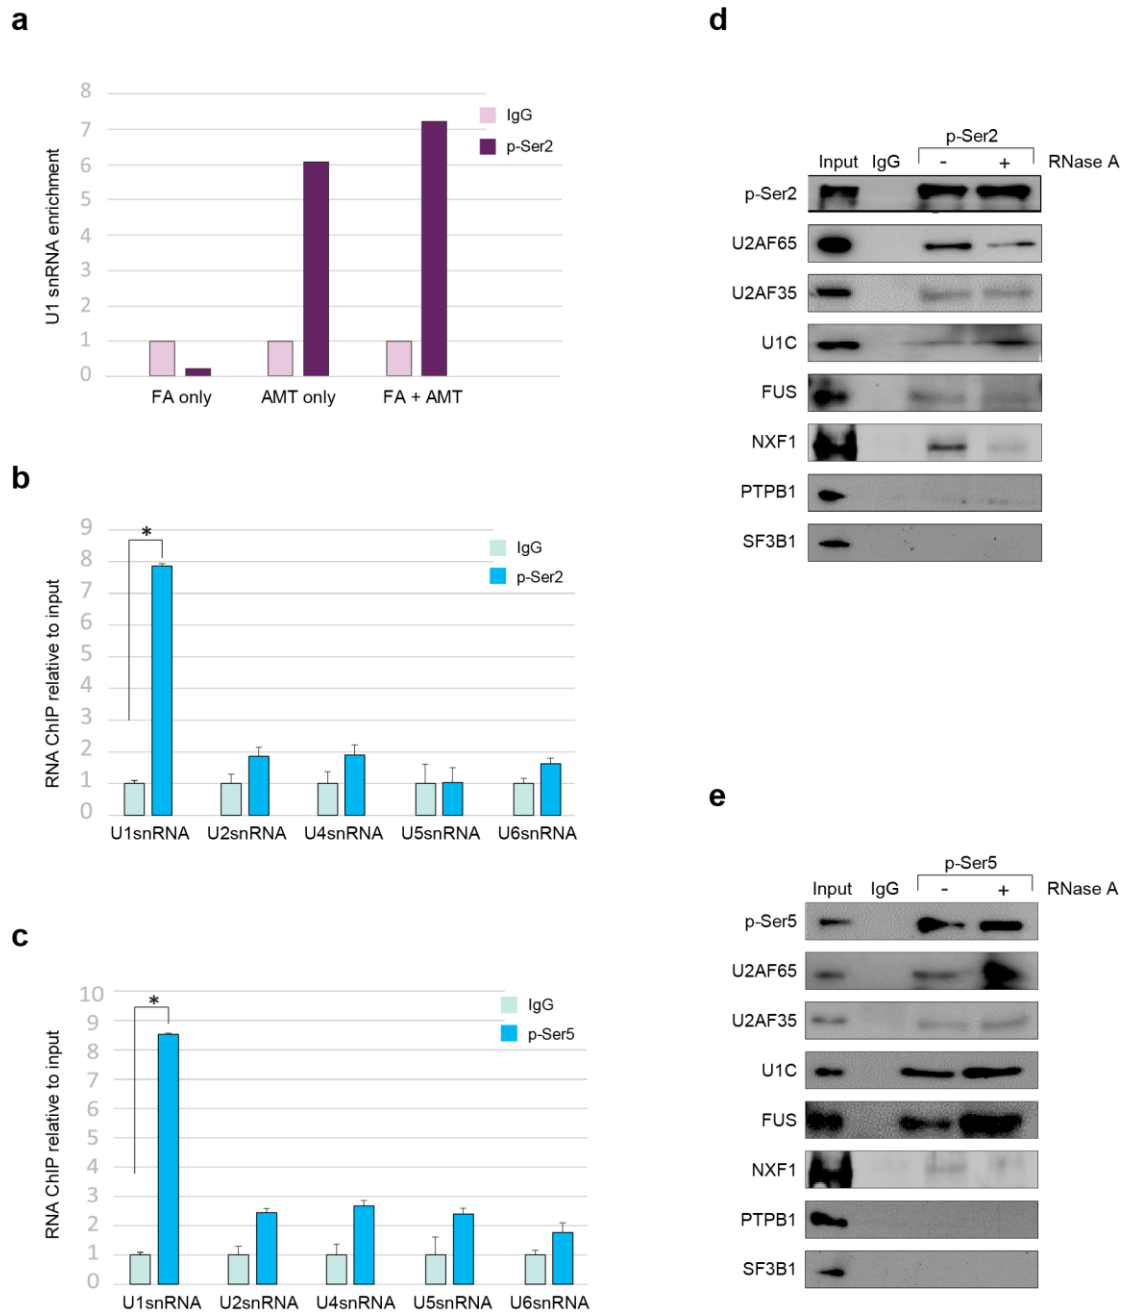

63

64 **Supplementary Figure 2. U1 snRNP associates with pol II.** **a.** HEK293 cells were  
 65 either crosslinked or not with FA and AMT, followed by purification of nuclei,  
 66 sonication, and RNA-ChIP using p-Ser2 pol II antibody or IgG antibody as a control.  
 67 Total RNA was extracted and reverse transcribed using RT-FLEX with hexamer  
 68 primers. U1 snRNA was quantified by qRT-PCR in one experiment. **b, c.** HEK293 cells  
 69 were treated with FA and AMT, followed by UV irradiation, purification of nuclei, and

70 DNA and RNA fragmentation, and RNA-ChIP with antibodies against: p-Ser2 (**b**) and  
71 p-Ser5 (**c**) pol II CTD. snRNA levels were measured by qRT-PCR.  $N=4$  for **b** and  $N=3$   
72 for **c** independent experiments. Error bars show mean values + SD. Asterisk indicates  
73 for panel **b**  $P = 1.23 \times 10^{-6}$ , for panel **c**  $P = 4.7 \times 10^{-4}$ , two-tailed t-test. **d, e.** Nuclear  
74 extracts of HEK293 cells were treated or not with RNase A and subjected to  
75 immunoprecipitation with antibodies against: p-Ser2 (**d**) and p-Ser5 (**e**) pol II CTD.  
76 Western blotting was performed with the indicated antibodies. Source data are provided  
77 as a Source Data file.

78

79

80

81

82

83

84

85

86

87

88

89

90

91

92

93 **Supplementary Figure 3**

**a**

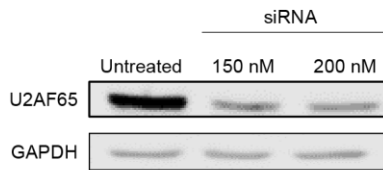

**b**

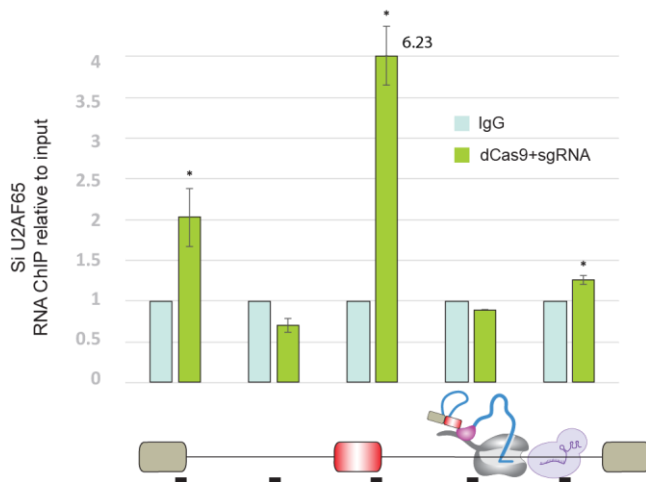

94

95

96 **Supplementary Figure 3. U2AF2 and the PPT are not essential for 5'SS association**

97 **with pol II.** **a.** Western blot analysis of total protein extracted 48 h after U2AF2 KD

98 using 150 nM or 200 nM of siRNA. Source data are provided as a Source Data file. **b.**

99 CRISPR interference-based experiment was performed after U2AF65 siRNA to

100 evaluate the association of various transcript regions with pol II located mid-intron 2 of

101 WT *FRG1* minigene. Mean RNA levels were measured.  $N=3$  independent experiments.

102 Each bar corresponds to the amplified segment marked in the gene diagram below the

103 graph. Error bars show mean values  $\pm$  SEM. From left to right asterisk indicates  $P =$

104 0.05,  $P = 0.007$ ,  $P = 0.002$ , two-tailed t-test.

105

106 **Supplementary Figure 4**

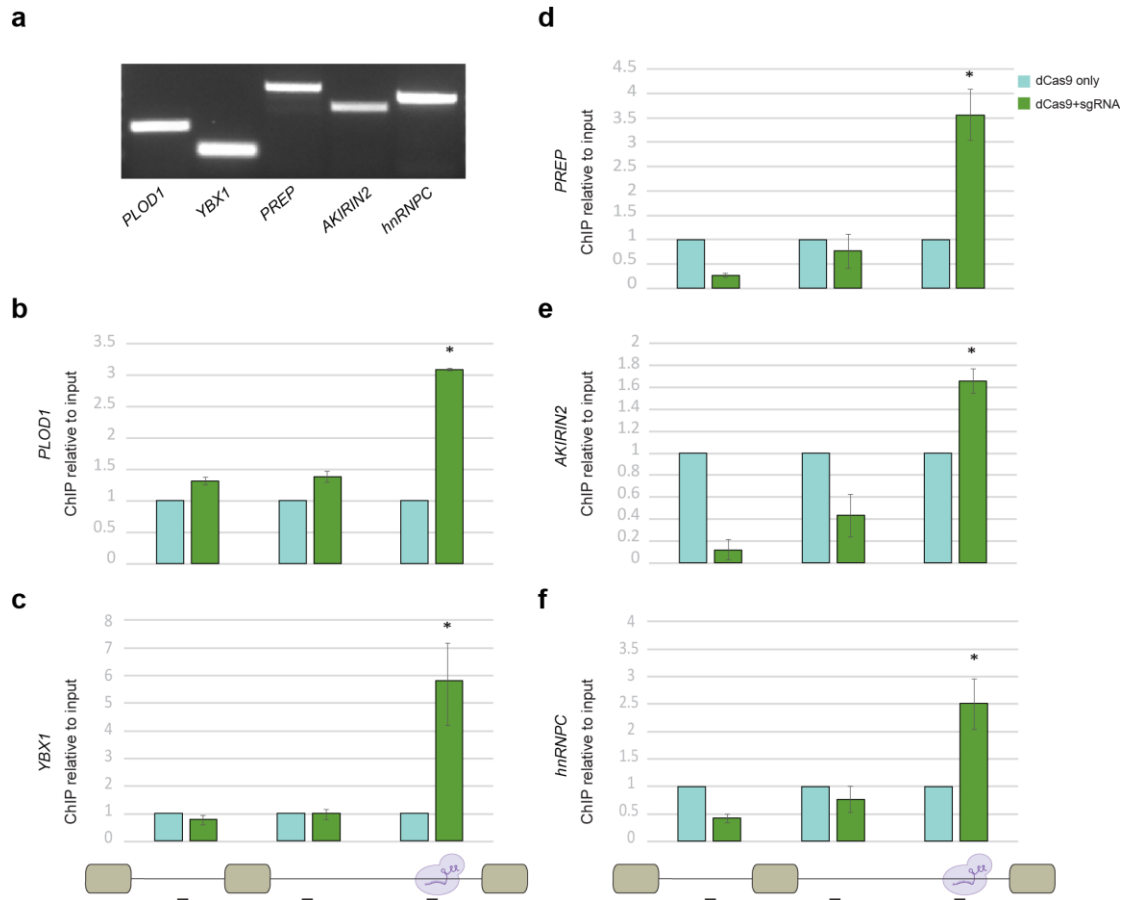

107

108 **Supplementary Figure 4. Splicing pattern of the endogenous genes, and sgRNA**  
 109 **binding efficient.** **a.** Total RNA was extracted from HEK293 cell line. RT-PCR was  
 110 performed to examine splicing pattern of the selected three exons. Source data are  
 111 provided as a Source Data file. **b-f.** Binding specificity of the sgRNAs. CRISPR  
 112 interference-based protocol targeting the middle intron of the indicated genes was  
 113 performed, and mean DNA levels were measured by qPCR.  $N=3$  independent  
 114 experiments. Error bars show mean values  $\pm$  SEM. Asterisk indicates for panel b  $P =$   
 115  $4.4 \times 10^{-8}$ , for panel c  $P = 0.016$ , for panel d  $P = 0.008$ , for panel e  $P = 0.004$ , for panel  
 116 f  $P = 0.03$ , two-tailed t-test. Each bar corresponds to the amplified segment marked in  
 117 the gene diagram below the graph. The sgRNA binding is indicated as a purple shape.

118

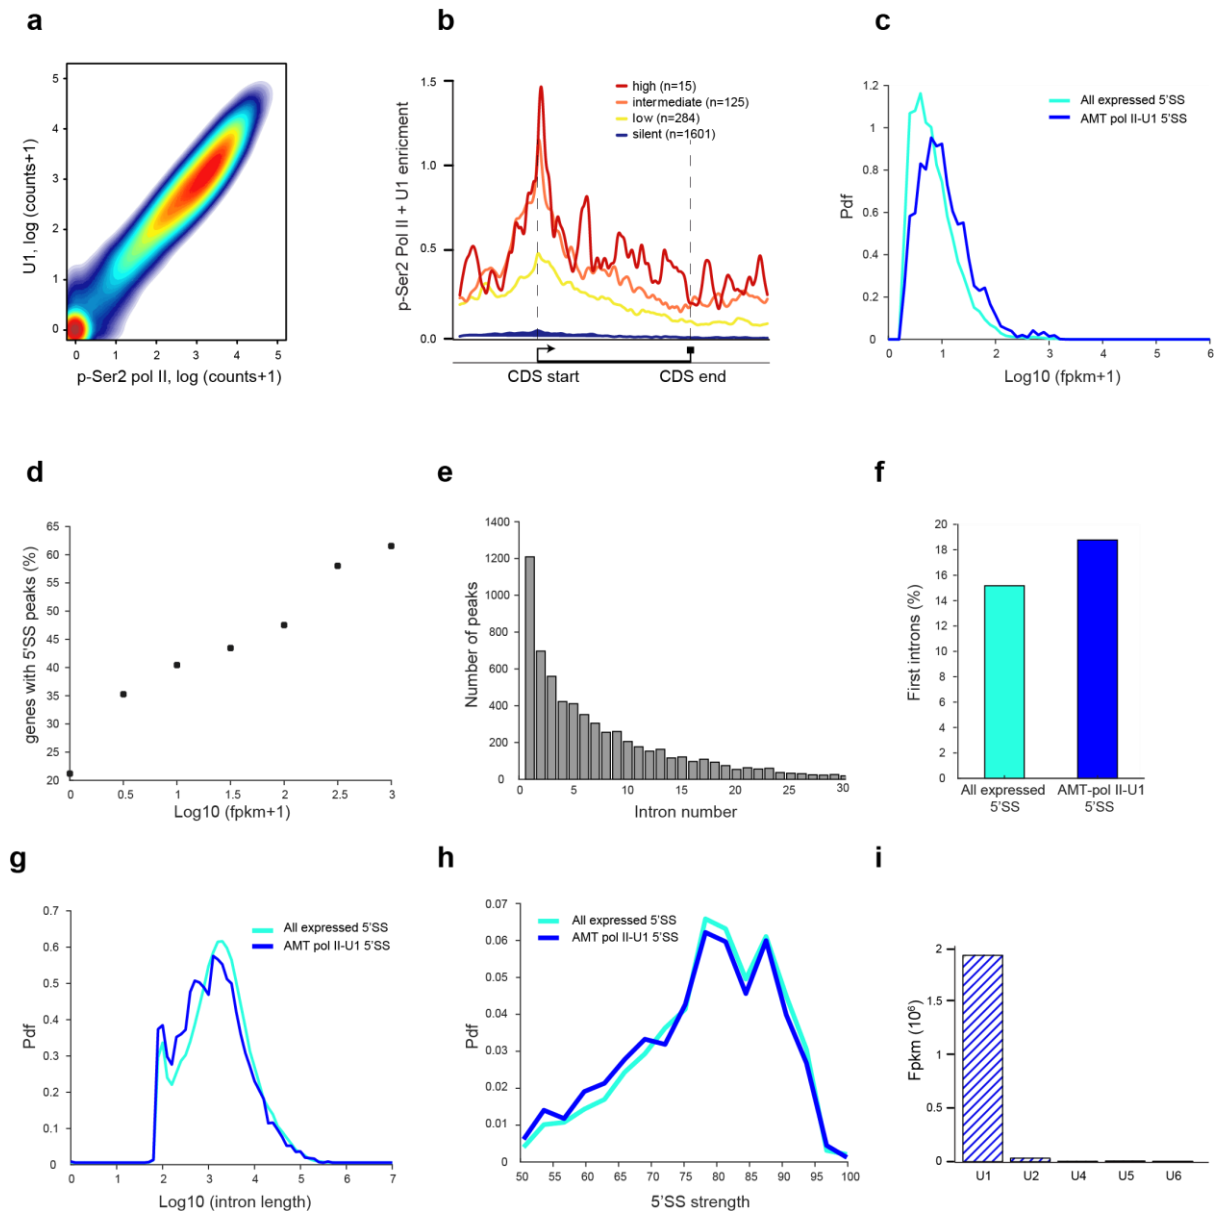

120

121 **Supplementary Figure 5. p-Ser2 pol II and U1 travel together on expressed genes.** a. p-  
 122 Ser2 pol II and U1 ChIP signals are highly correlated. Pearson coefficient = 0.9887,  $P = 2.2 \times 10^{-16}$ ,  
 123 one-tailed correlation test. b. p-Ser2 pol II:U1C occupancy over intronless genes surrounded  
 124 by 500 bp flanking sequences around the coding regions. Genes were divided based on  
 125 expression (fpkm) into high, intermediate, low, and silent. Coding regions were scaled to 1000  
 126 bp. c. Expression distribution of pol II-U1-5'SS peaks in expressed genes compared to all 5'SS  
 127 in expressed genes. d. Percentage of genes with pol II-U1-5'SS peaks among expressed genes



128 with different expression level thresholds. **e.** Intron number distribution of the pol II-U1-5'SS  
129 peaks in expressed genes. **f.** The fraction of first introns among pol II-U1-5'SS peaks in  
130 expressed genes compared to all 5'SS in expressed genes. One-tailed population proportion test  
131  $z$  is  $-7.8407$ ,  $P < 10^{-10}$ .  $N=126,770$  expressed junctions. **g.** Intron length and **h.** 5'SS strength  
132 of pol II-U1-5'SS peaks in expressed genes compared to all 5'SS in expressed genes. **i.**  
133 Spliceosomal snRNA levels (fpkm) in double RNA-ChIP sample, Pdf – probability density  
134 function.

135 **Supplementary Tables**

136 **Supplementary Table 1: Oligonucleotide sequences used in the cloning of single guide**  
 137 **RNAs.** Each sgRNA oligonucleotide was annealed to its complementary oligonucleotide  
 138 before cloned into pX552 sgRNA expression plasmid. All sgRNAs used in this work are listed.

| Name                     | Sequence (5' - 3')    | Notes                                    |
|--------------------------|-----------------------|------------------------------------------|
| <i>FRG1</i> - intron 1-1 | ATCCCAGGAGATTCTCGGTA  | Targets intron 1 of <i>FRG1</i> minigene |
| <i>FRG1</i> - intron 1-2 | TTACCTTACCGAGAATCTCC  | Targets intron 1 of <i>FRG1</i> minigene |
| <i>FRG1</i> - intron 2-1 | GGCACAGGTTTAAATCGTCT  | Targets intron 2 of <i>FRG1</i> minigene |
| <i>FRG1</i> - intron 2-2 | AGTATCTCATCCTAACTAGT  | Targets intron 2 of <i>FRG1</i> minigene |
| <i>PLOD1</i> -1          | GTTCCCGGAAACAATTACC   | Targets intron 17 of <i>PLOD1</i> gene   |
| <i>PLOD1</i> -2          | GAATTGTGAGAATTAACCG   | Targets intron 17 of <i>PLOD1</i> gene   |
| <i>YBX1</i> -1           | AACCCTTAAGGGTTGCCAAC  | Targets intron 3 of <i>YBX1</i> gene     |
| <i>YBX1</i> -2           | CTGCTATCCCCTATGACTGC  | Targets intron 3 of <i>YBX1</i> gene     |
| <i>AKIRIN2</i> -1        | ATGTTTCAACCACTAATACC  | Targets intron 2 of <i>AKIRIN2</i> gene  |
| <i>AKIRIN2</i> -2        | GGGCACTAGACTGTATTAGC  | Targets intron 2 of <i>AKIRIN2</i> gene  |
| <i>hmRNPC</i> -1         | GCCTTAGACAGTTCCTAATT  | Targets intron 2 of <i>hmRNPC</i> gene   |
| <i>hmRNPC</i> -2         | TAGAGTTCTAATGCTAGATT  | Targets intron 2 of <i>hmRNPC</i> gene   |
| <i>PREP</i> -1           | TCACCGTTCAACCACTAAG   | Targets intron 9 of <i>PREP</i> gene     |
| <i>PREP</i> -2           | GCGGCAAACCTTTGTAACCCA | Targets intron 9 of <i>PREP</i> gene     |

139

140

141

142

143 **Supplementary Table 2: Oligonucleotide sequences used in PCR and quantitative PCR.**  
 144 Primer sequences are included for different assays: splicing by RT-PCR of *FRG1* minigene  
 145 and endogenous genes, qRT-PCR for co-transcriptional analysis, ChIP and RNA ChIP  
 146 experiments.

| Name                   | Sequence (5' - 3')                  | Assay                                       |
|------------------------|-------------------------------------|---------------------------------------------|
| <i>FRG1</i> minigene-F | AAAGGTACCTTGATGAGGGCCCTAGTCCT<br>CC | Used in <i>FRG1</i> minigene construction   |
| <i>FRG1</i> minigene-R | AAAGGATCCCTTGATCATTCTTCTTCTCC       | Used in <i>FRG1</i> minigene construction   |
| U1-F-1                 | CCATGATCACGAAGGTGGTTT               | Used in RNA ChIP-qPCR to amplify<br>U1snRNA |
| U1-R-1                 | ATGCAGTCGAGTTTCCCACAT               | Used in RNA ChIP-qPCR to amplify<br>U1snRNA |
| U2-F                   | TCCCAGGGCGAGGCTTATCCATT             | Used in RNA ChIP-qPCR to amplify<br>U2snRNA |
| U2-R                   | GAACGCAGTCCCCACTACCACAAAT           | Used in RNA ChIP-qPCR to amplify<br>U2snRNA |
| U4-F                   | CTCGGCCTTTTGCTAAGAT                 | Used in RNA ChIP-qPCR to amplify<br>U4snRNA |
| U4-R                   | TATCCATCTCCCTGCTCCA                 | Used in RNA ChIP-qPCR to amplify<br>U4snRNA |
| U5-F                   | GATCATTTCTATAGTGTGTTACTAGA          | Used in RNA ChIP-qPCR to amplify<br>U5snRNA |
| U5-R                   | CAATACGGAGAGAAGAACGATC              | Used in RNA ChIP-qPCR to amplify<br>U5snRNA |
| U6-F                   | GCAGTATCGTAGCCAATGAGG               | Used in RNA ChIP-qPCR to amplify<br>U6snRNA |
| U6-R                   | CTGTCAAAAATTGCCAGTGCC               | Used in RNA ChIP-qPCR to amplify<br>U6snRNA |

|                     |                             |                                                                                                                    |
|---------------------|-----------------------------|--------------------------------------------------------------------------------------------------------------------|
| FRT Fw              | GTTTTGACCTCCATAGAAGACAC     | Used in PCR to check <i>FRG1</i> splicing and in qPCR to amplify spliced transcript (“spliced 1”)                  |
| FRT Rv              | CTGATCAGCGGGTTTAAACGT       | Used in PCR to check <i>FRG1</i> splicing and in qPCR to amplify spliced transcript (“spliced 2”)                  |
| R-juncEX2_EX1-FRG1  | TCA GGG CGA TTC TGG AAT CAG | Used in qPCR to amplify spliced co-transcriptional <i>FRG1</i> transcripts (“spliced 1”)                           |
| F-uniqex1           | TAGTCCTCCAGAGCAGTTTAC       | Used in qPCR to amplify unspliced co-transcriptional <i>FRG1</i> transcripts (“spliced 1”)                         |
| FRG-in1-R           | CTGTGGGCTTAAGACAGATAC       | Used in qPCR to amplify unspliced co-transcriptional <i>FRG1</i> transcripts (“spliced 1”)                         |
| F-juncEX2-EX3-FRG1  | GTCTTTCAAAAATGGGAAAATGGC    | Used in qPCR to amplify spliced co-transcriptional <i>FRG1</i> transcripts (“spliced 2”)                           |
| FRG1_ex2 splicing_F | GAACAATGGGAACCAGTCTTTC      | Used in qPCR to amplify unspliced co-transcriptional <i>FRG1</i> transcripts (“spliced 2”)                         |
| FRG-in2-R           | TATGATTGACTGTTAACAGACTTTCT  | Used in qPCR to amplify unspliced co-transcriptional <i>FRG1</i> transcripts (“spliced 2”)                         |
| F-uniq in1 BS       | ACCACTCAGCCACATGCAG         | Used in qPCR to amplify branch site sequence of <i>FRG1</i> intron 1. Used for U2 and U2AF65 RNA ChIP experiments. |
| R-uniq in1 BS       | GGACATCAAAAACAGGACATGC      | Used in qPCR to amplify branch site sequence of <i>FRG1</i> intron 1. Used for U2 and U2AF65 RNA ChIP experiments. |

|                     |                           |                                                                                                                                                                                |
|---------------------|---------------------------|--------------------------------------------------------------------------------------------------------------------------------------------------------------------------------|
| FRG1-in2gRNACheck-F | CCAGCACACATGTATAACTGAAG   | Used in PCR for checking sgRNA efficient.                                                                                                                                      |
| in2gRNACheck-R      | GCTTAACTCCCTAACAAATATAATG | Used in PCR for checking sgRNA efficient.                                                                                                                                      |
| FRT_Fw              | GTTTTGACCTCCATAGAAGACAC   | Used in qPCR for transcription inhibition by dCas9 in <i>FRG1</i> minigene experiment (“Upstream”).                                                                            |
| FRG-EX1-R           | ACTGCTCTGGAGGACTAGG       | Used in qPCR for transcription inhibition by dCas9 in <i>FRG1</i> minigene experiment (“Upstream”).                                                                            |
| FRG-in2near 3ss-F   | CACAAGAAGTATCCTCATGGC     | Used in qPCR for transcription inhibition by dCas9 in <i>FRG1</i> minigene experiment (“Downstream”).                                                                          |
| FRT_Rv              | CTGATCAGCGGGTTTAAACGT     | Used in qPCR for transcription inhibition by dCas9 in <i>FRG1</i> minigene experiment (“Downstream”).                                                                          |
| F-uniqex1           | TAGTCCTCCAGAGCAGTTTAC     | Used in qPCR for CRISPR interference protocol to amplify <i>FRG1</i> minigene regions (first 5’SS).                                                                            |
| FRG-in1-R           | CTGTGGGCTTAAGACAGATAC     | Used in qPCR for CRISPR interference protocol to amplify <i>FRG1</i> minigene regions (first 5’SS).                                                                            |
| F-uniqin1upsg       | CAGAGAATGTTACAGAATCATAACG | Used in qPCR for CRISPR interference protocol to amplify <i>FRG1</i> minigene regions (negative control 1 intron 1 for sgRNA intron 2 or positive control for sgRNA intron 1). |
| R-uniqin1upsg       | CTATACTTTTGCACAAGGTGAGA   | Used in qPCR for CRISPR interference protocol to amplify <i>FRG1</i> minigene regions (negative control 1 intron 1 for sgRNA intron 2 or positive control for sgRNA intron 1). |

|                       |                                |                                                                                                                              |
|-----------------------|--------------------------------|------------------------------------------------------------------------------------------------------------------------------|
| FRG1-mid INTRON1-F    | TGCGAACAAATCAGATCTCAATAGA      | Used in qPCR for CRISPR interference protocol to amplify <i>FRG1</i> minigene regions (negative control 2 intron 1).         |
| R-FRG1-mid INTRON1    | AGTATCCTATAAAATTTGCATTTTAGTAGT | Used in qPCR for CRISPR interference protocol to amplify <i>FRG1</i> minigene regions (negative control 2 intron 1).         |
| FRG1-JUNCTION-WT-F    | CAATGGGAACCAAGTCTTTCAAATG      | Used in qPCR for CRISPR interference protocol to amplify <i>FRG1</i> minigene regions (second 5'SS WT).                      |
| FRG1-JUNCTION-MUT-F   | CAATGGGAACCAAGTCTTTCAAATA      | Used in qPCR for CRISPR interference protocol to amplify <i>FRG1</i> minigene regions (second 5'SS MUT).                     |
| FRG-in2-R             | TATGATTGACTGTAAACAGACTTTCT     | Used in qPCR for CRISPR interference protocol to amplify <i>FRG1</i> minigene regions (second 5'SS).                         |
| FRG1-middle intron2-F | CAGTAAGGACCAATGGGCAC           | Used in qPCR for CRISPR interference protocol to amplify <i>FRG1</i> minigene regions (negative control 3 intron 2).         |
| R-FRG1-middle intron2 | CTTAGAAAACACTGCTGAGTTCC        | Used in qPCR for CRISPR interference protocol to amplify <i>FRG1</i> minigene regions (negative control 3 intron 2).         |
| F-FRGIN2-near-sg      | GACTTAGATAGTACTAATAATAACAACA   | Used in qPCR for CRISPR interference protocol to amplify <i>FRG1</i> minigene regions (positive control for sgRNA intron 2). |
| R-FRGIN2-near-sg      | GCAATAGTTTTAAGACCCTCTTTC       | Used in qPCR for CRISPR interference protocol to amplify <i>FRG1</i> minigene regions (positive control for sgRNA intron 2). |
| PLOD1_5ss_up          | GAGGAGATGGAGCACTTTGG           | Used in PCR to check <i>PLOD1</i> splicing                                                                                   |
| PLOD1_splice_R        | GAGGGCTGCTCATCAGGC             | Used in PCR to check <i>PLOD1</i> splicing                                                                                   |
| YBX1-ex2-F            | CAACGAAGGTTTTGGGAACAG          | Used in PCR to check <i>YBX1</i> splicing                                                                                    |

|                   |                           |                                                                                                              |
|-------------------|---------------------------|--------------------------------------------------------------------------------------------------------------|
| YBX1_splice_R     | CACAGTCTCTCCATCTCCTAC     | Used in PCR to check <i>YBX1</i> splicing                                                                    |
| F_PREPex7         | TACAGCAGGAATCCAGTGGC      | Used in PCR to check <i>PREP</i> splicing                                                                    |
| R_PREPex10        | TGGAATCTTCGTACCATCCTTG    | Used in PCR to check <i>PREP</i> splicing                                                                    |
| AKIRIN2_ex1_F     | GTATCTCCGAATGGAGCCATC     | Used in PCR to check <i>AKIRIN2</i> splicing                                                                 |
| AKIRIN2_ex4_R     | CATTATTTGATCATGCGTAAACTCA | Used in PCR to check <i>AKIRIN2</i> splicing                                                                 |
| HNRNPC_ex1_F      | ACGAAGACTGAGCGTTGTG       | Used in PCR to check <i>hnRNPC</i> splicing                                                                  |
| HNRNPC_ex4_R      | CGCTGCAGATCGTTTCACAC      | Used in PCR to check <i>hnRNPC</i> splicing                                                                  |
| PLOD1_5ss_up      | GAGGAGATGGAGCACTTTGG      | Used in qPCR for CRISPR interference protocol to amplify <i>PLOD1</i> regions (first 5'SS).                  |
| PLOD1_5ss_up-R    | AGAAGACCCCAGACAGTGAG      | Used in qPCR for CRISPR interference protocol to amplify <i>PLOD1</i> regions (first 5'SS).                  |
| PLOD1_neg.cont1-F | CACTGTACTTAAAGGCAACATTAC  | Used in qPCR for CRISPR interference protocol to amplify <i>PLOD1</i> regions (negative control 1 intron 1). |
| PLOD1_neg.cont1-R | GAGGTGGGTTGGGGCTTG        | Used in qPCR for CRISPR interference protocol to amplify <i>PLOD1</i> regions (negative control 1 intron 1). |
| PLOD1_5ss_down-F  | CAAATTCCTGCTGGAGTACATTG   | Used in qPCR for CRISPR interference protocol to amplify <i>PLOD1</i> regions (second 5'SS).                 |
| PLOD1_5ss_down-R  | CCCAGCCACTCCACTGAC        | Used in qPCR for CRISPR interference protocol to amplify <i>PLOD1</i> regions (second 5'SS).                 |

|                   |                          |                                                                                                              |
|-------------------|--------------------------|--------------------------------------------------------------------------------------------------------------|
| PLOD1_neg.cont3-F | AGTACGGGTGGAGGAACATC     | Used in qPCR for CRISPR interference protocol to amplify <i>PLOD1</i> regions (negative control 2 intron 2). |
| PLOD1_neg.cont3-R | CACACGCTACTAGATGGAGG     | Used in qPCR for CRISPR interference protocol to amplify <i>PLOD1</i> regions (negative control 2 intron 2). |
| PLOD1_pos.cont-F  | GCCCTGCTTCGTCCGAAG       | Used in qPCR for CRISPR interference protocol to amplify <i>PLOD1</i> regions (positive control).            |
| PLOD1_pos.cont-R  | GCATTCAAGGGATGAATGACAAC  | Used in qPCR for CRISPR interference protocol to amplify <i>PLOD1</i> regions (positive control).            |
| YBX1_5ss_up-F     | GGAACGGATATGGTTTCATCAAC  | Used in qPCR for CRISPR interference protocol to amplify <i>YBX1</i> regions (first 5'SS).                   |
| YBX1_5ss_up-R     | CGCCTTTCAGAACAGAGCTG     | Used in qPCR for CRISPR interference protocol to amplify <i>YBX1</i> regions (first 5'SS).                   |
| YBX1_neg.cont1-F  | GTGTCAGACTGTGCAGGTG      | Used in qPCR for CRISPR interference protocol to amplify <i>YBX1</i> regions (negative control 1 intron 1).  |
| YBX1_neg.cont1-R  | CAAGCTGTCAAGTTCCTATGG    | Used in qPCR for CRISPR interference protocol to amplify <i>YBX1</i> regions (negative control 1 intron 1).  |
| YBX1_5ss_down-F   | CCAAGGAAGATGTATTTGTACAC  | Used in qPCR for CRISPR interference protocol to amplify <i>YBX1</i> regions (second 5'SS).                  |
| YBX1_5ss_down-R   | GCTGAGAACATATCTAACCTTTTC | Used in qPCR for CRISPR interference protocol to amplify <i>YBX1</i> regions (second 5'SS).                  |
| YBX1_neg.cont2-F  | CTGATGAGTACTGCATAGTGAAC  | Used in qPCR for CRISPR interference protocol to amplify <i>YBX1</i> regions (negative control 2 intron 2).  |



|                  |                          |                                                                                                             |
|------------------|--------------------------|-------------------------------------------------------------------------------------------------------------|
| YBX1_neg.cont2-R | CACTTGGCAGTGGTTTACATTAG  | Used in qPCR for CRISPR interference protocol to amplify <i>YBX1</i> regions (negative control 2 intron 2). |
| YBX1_pos.cnt-2 F | GTATTTGATGACAAGGAGGAAGC  | Used in qPCR for CRISPR interference protocol to amplify <i>YBX1</i> regions (positive control).            |
| YBX1_pos.cnt-2 R | AACATTTTGTCTGAAGTAGTCCTG | Used in qPCR for CRISPR interference protocol to amplify <i>YBX1</i> regions (positive control).            |
| F_junc1_PREP     | GTA CTGTTCCTGAGCATGAG    | Used in qPCR for CRISPR interference protocol to amplify <i>PREP</i> regions (first 5'SS).                  |
| R_junc1_PREP     | ACTAGAGAATGAGAGACGCAC    | Used in qPCR for CRISPR interference protocol to amplify <i>PREP</i> regions (first 5'SS).                  |
| F-mid1_new2_PREP | TCTTCTGCACCTCATCCAG      | Used in qPCR for CRISPR interference protocol to amplify <i>PREP</i> regions (negative control 1 intron 1). |
| R-mid1_new2_PREP | GACTGGTGGGTTGAGGATC      | Used in qPCR for CRISPR interference protocol to amplify <i>PREP</i> regions (negative control 1 intron 1). |
| F_junc2_PREP     | AAGGACACTGAAATCTTCTATCAG | Used in qPCR for CRISPR interference protocol to amplify <i>PREP</i> regions (second 5'SS).                 |
| R_junc2_PREP     | CATAGCATTATACTTCCATTTCCC | Used in qPCR for CRISPR interference protocol to amplify <i>PREP</i> regions (second 5'SS).                 |
| F_mid2_PREP      | AACCTGGAGTACAGCAGCAG     | Used in qPCR for CRISPR interference protocol to amplify <i>PREP</i> regions (negative control 2 intron 2). |
| R_mid2_PREP      | ACTTCTGTACCCAGTGAAATTTG  | Used in qPCR for CRISPR interference protocol to amplify <i>PREP</i> regions (negative control 2 intron 2). |

|                   |                           |                                                                                                                |
|-------------------|---------------------------|----------------------------------------------------------------------------------------------------------------|
| F_nSG_PREP        | GACATTTGATAACTCTGGCAGG    | Used in qPCR for CRISPR interference protocol to amplify <i>PREP</i> regions (positive control).               |
| R_nSG_PREP        | GTAAGTCATAAATGGCTTGGGC    | Used in qPCR for CRISPR interference protocol to amplify <i>PREP</i> regions (positive control).               |
| F_junc1_Akir      | CTCACCACAGGTGGGACC        | Used in qPCR for CRISPR interference protocol to amplify <i>AKIRIN2</i> regions (first 5'SS).                  |
| R_junc1_Akir      | TGCTAAGAACAAGAACCACACAGTC | Used in qPCR for CRISPR interference protocol to amplify <i>AKIRIN2</i> regions (first 5'SS).                  |
| AKIRIN2_int1F     | TGCCCAGTTGTGAGTATCTTTC    | Used in qPCR for CRISPR interference protocol to amplify <i>AKIRIN2</i> regions (negative control 1 intron 1). |
| AKIRIN2_int1R     | CAACTATTCAAGAGGCCCAAAC    | Used in qPCR for CRISPR interference protocol to amplify <i>AKIRIN2</i> regions (negative control 1 intron 1). |
| AKIRIN2_ex2int2F  | ACCAGCTTCACCAGGTAATAAC    | Used in qPCR for CRISPR interference protocol to amplify <i>AKIRIN2</i> regions (second 5'SS).                 |
| AKIRIN2_ex2int2R  | GAGGAGATACAGTAGCTTAAATGAC | Used in qPCR for CRISPR interference protocol to amplify <i>AKIRIN2</i> regions (second 5'SS).                 |
| AKIRIN2_int2F3    | GTACCTTGTCATGACTGAACAC    | Used in qPCR for CRISPR interference protocol to amplify <i>AKIRIN2</i> regions (negative control 2 intron 2). |
| AKIRIN2_int2R3    | ATAAGACAAGTGTGTGAGGCAG    | Used in qPCR for CRISPR interference protocol to amplify <i>AKIRIN2</i> regions (negative control 2 intron 2). |
| AKIRIN2int2_seq_F | AAATCAAAGACCATAACATAGTC   | Used in qPCR for CRISPR interference protocol to amplify <i>AKIRIN2</i> regions (positive control).            |

|                   |                         |                                                                                                               |
|-------------------|-------------------------|---------------------------------------------------------------------------------------------------------------|
| R near guide Akir | CAATGGGCATGGCAGTATTTAG  | Used in qPCR for CRISPR interference protocol to amplify <i>AKIRIN2</i> regions (positive control).           |
| Fjunc1_HNRNPC     | CCCCTTCTTGTAAGTGGAG     | Used in qPCR for CRISPR interference protocol to amplify <i>hnRNPC</i> regions (first 5'SS).                  |
| HNRNPC_int1R      | ACAAGCAGAATAAATGAGGGCC  | Used in qPCR for CRISPR interference protocol to amplify <i>hnRNPC</i> regions (first 5'SS).                  |
| HNRNPC_int1F      | GAATGGCTGTGCGAAACAAGC   | Used in qPCR for CRISPR interference protocol to amplify <i>hnRNPC</i> regions (negative control 1 intron 1). |
| HNRNPC_int1R2     | AACTCCTAGGCAAACCTACTCC  | Used in qPCR for CRISPR interference protocol to amplify <i>hnRNPC</i> regions (negative control 1 intron 1). |
| HNRNPC_ex2int2F   | TTTTGATCTTCAGCTACAGTAAG | Used in qPCR for CRISPR interference protocol to amplify <i>hnRNPC</i> regions (second 5'SS).                 |
| HNRNPC_int2R4     | GTGTCATTATCATCATCATCATC | Used in qPCR for CRISPR interference protocol to amplify <i>hnRNPC</i> regions (second 5'SS).                 |
| HNRNPC_int2F3     | CTGAAAGCCATCTTCCTCTCTG  | Used in qPCR for CRISPR interference protocol to amplify <i>hnRNPC</i> regions (negative control 2 intron 2). |
| HNRNPC_int2R3     | CTGGGCATCCATGTTGCTG     | Used in qPCR for CRISPR interference protocol to amplify <i>hnRNPC</i> regions (negative control 2 intron 2). |
| F_nSG3_HNRNPC     | AAGAGTCAAACCATAGGAGATAC | Used in qPCR for CRISPR interference protocol to amplify <i>hnRNPC</i> regions (positive control).            |
| R_nSG3_HNRNPC     | ATTTCCTGCTTTGTGAGGTC    | Used in qPCR for CRISPR interference protocol to amplify <i>hnRNPC</i> regions (positive control).            |

|             |                            |                                                                                                            |
|-------------|----------------------------|------------------------------------------------------------------------------------------------------------|
| FRG_mutx2_R | GAAGTTTTATAACAATAACAGCTCTC | Used in qPCR for CRISPR interference protocol to amplify <i>FRG1</i> minigene regions (second 5'SS MUTx2). |
|-------------|----------------------------|------------------------------------------------------------------------------------------------------------|
